# Supplementary material for: The nature of phase separation in a Ru–Sn–O ternary oxide electrocatalyst
Source: Royal Society of Chemistry journal article supplement (doi:10.1039/c3cp44528c), 2013-01-01
Supplement: c3cp44528c.pdf [file c3cp44528c.pdf]

## Supplementary information

### The nature of phase separation in Ru-Sn-O ternary oxide electrocatalyst

Xin Wang<sup>a</sup>, Fenyong Deng<sup>a</sup>, Zhongzhi Tang<sup>b</sup>, Bo Wu<sup>a</sup>, Dian Tang<sup>a,b\*</sup>, Wei Lin<sup>b,c,d\*</sup>

<sup>a</sup> College of Material Science and Engineering, Fuzhou University, Fuzhou, Fujian,  
350108, China

<sup>b</sup> Institute of Materials Research, Fuzhou University, Fuzhou, Fujian, 350108, China

<sup>c</sup> School of Materials Science and Engineering, Georgia Institute of Technology, Atlanta,  
Georgia, 30332, USA.

<sup>d</sup> Present address: International Business Machines (IBM), Albany Nanotechnology  
Center, Albany, New York, 12203, USA.

**(A)**

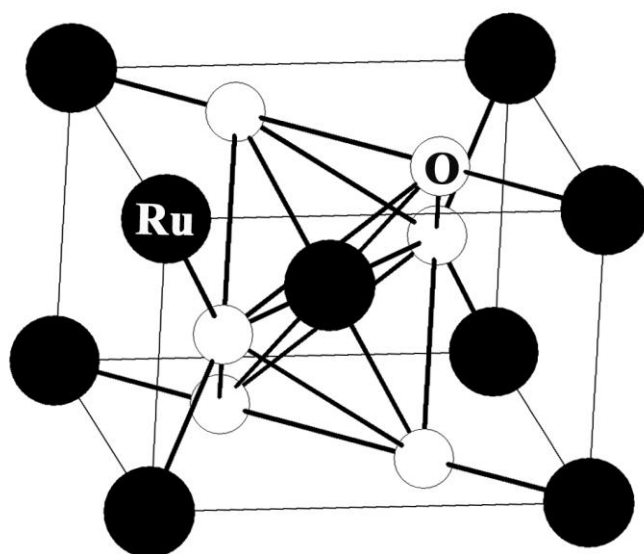

**(B)**

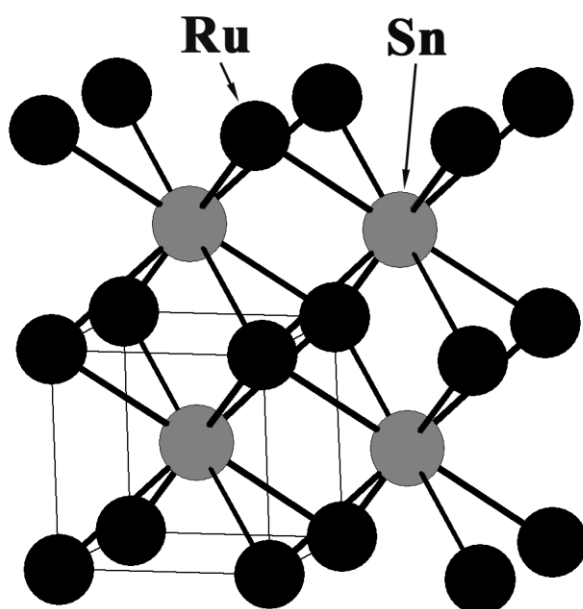

Fig. 1S. The diagrammatic structures of the rutile unit cell (A) and Ru<sub>0.5</sub>Sn<sub>0.5</sub> sub-lattice supercell (B).

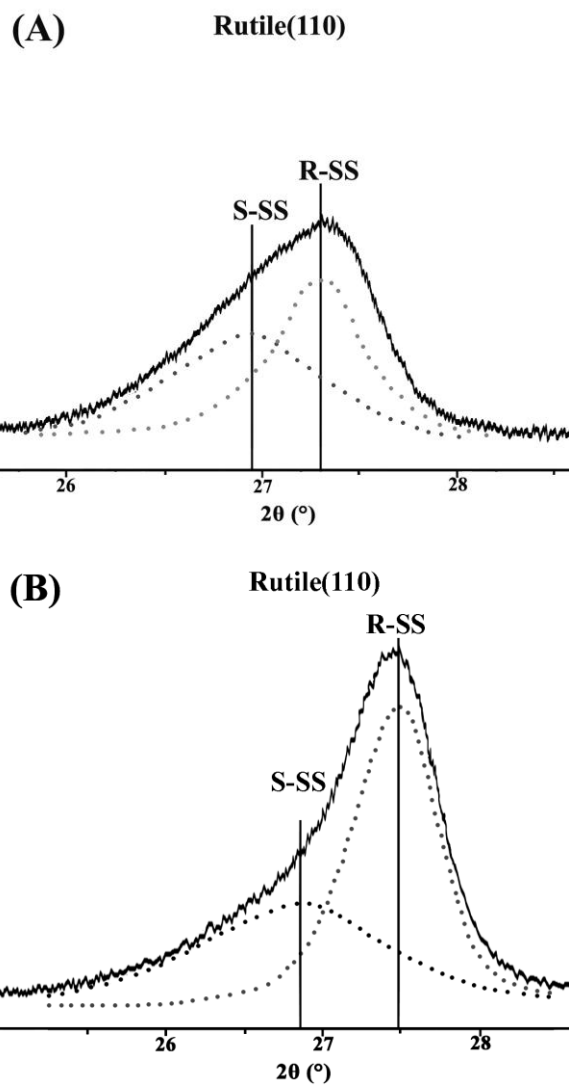

Fig. 2S. XRD spectra of RSO10 (A) and RSO60 (B).
